# Supplementary material
Source: Springer Nature journal article supplement (https://www.springermedizin.de/resource/supplementary/12881_2009_609_MOESM6_ESM.pdf/9451060)

# Family 3 (177)

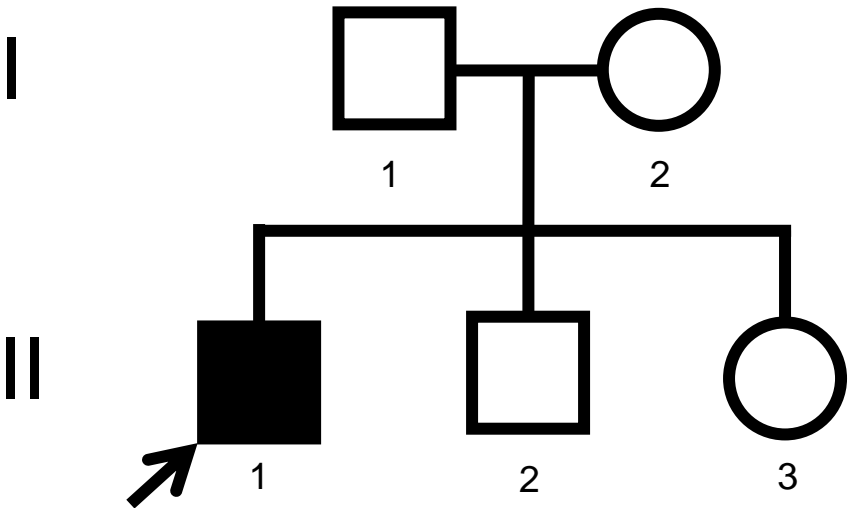

Supplement: MOESM6 [file 9451060]
